# Supplementary material for: Peanut sprout rich in p-coumaric acid ameliorates obesity and lipopolysaccharide-induced inflammation and the inhibition of browning in adipocytes via mitochondrial activation
Source: Royal Society of Chemistry journal article supplement (doi:10.1039/d1fo00342a), 2021-01-01
Supplement: d1fo00342a1.pdf [file d1fo00342a1.pdf]

1 **Table S1.** Dietary composition of low-fat (LF) diet, high-fat (HF) diet, and HF plus 4% peanut  
2 sprouts powder (HF + PS) diet

3

| <b>Ingredients</b>    | <b>LF</b> | <b>HF</b> | <b>HF + PS</b> |
|-----------------------|-----------|-----------|----------------|
|                       | g/kg      | g/kg      | g/kg           |
| Casein                | 200       | 200       | 200            |
| L-Cysteine            | 3         | 3         | 3              |
| Sucrose               | 100       | 69        | 69             |
| Corn starch           | 600       | 0         | 0              |
| Maltodextrin 10       | 50        | 125       | 125            |
| Lard                  | 10        | 245       | 245            |
| Soybean oil           | 39        | 39        | 39             |
| Cellulose             | 50        | 50        | 10             |
| Mineral mix           | 35        | 35        | 35             |
| Calcium phosphate     | 4         | 4         | 4              |
| Vitamin mix           | 10        | 10        | 10             |
| Choline bitartrate    | 2         | 2         | 2              |
| Peanut Sprouts powder | 0         | 0         | 40             |
| Total                 | 1002.9    | 767.2     | 767.2          |
|                       | kcal (%)  | kcal (%)  | kcal (%)       |
| Carbohydrate          | 68        | 20        | 20             |
| Protein               | 21        | 19        | 19             |
| Fat                   | 11        | 61        | 61             |

4

<sup>1</sup> The AIN-93G diet was modified.

5 **Table S2.** Nutritional profiles of the PS powder.

|                             | <b>Peanut sprout (Amount per 100g)</b> |
|-----------------------------|----------------------------------------|
| Calories (kcal/100g)        | 407.0                                  |
| Sodium (mg/100g)            | 60.9                                   |
| Total Carbohydrate (g/100g) | 38.9                                   |
| Total Sugars (g/100g)       | 3.2                                    |
| Total Fat (g/100g)          | 25.1                                   |
| Trans Fat (g/100g)          | -                                      |
| Saturated Fat (g/100g)      | 4.7                                    |
| Cholesterol (mg/100g)       | 3.6                                    |
| Protein (g/100g)            | 24.1                                   |
| Cellulose (g/100g)          | 35.7                                   |

6

7 **Table S3.** Primer sequences for real-time PCR

| <b>Gene</b> | <b>Forward</b> | <b>Reverse</b> |
|-------------|----------------|----------------|
|-------------|----------------|----------------|

---

|                                  |                           |                           |
|----------------------------------|---------------------------|---------------------------|
| <i>m36B4</i>                     | GGATCTGCTGCATCTGCTTG      | GGCGACCTGGAAGTCCAAC       |
| <i>maP2</i>                      | AGCATCATAACCCTAGATGGCG    | CATAACACATTCCACCACCAGC    |
| <i>mC/EBP<math>\alpha</math></i> | GGTTTTGCTCTGATTCTTGCC     | CGAAAAAACCCAAACATCCC      |
| <i>mCIDEA</i>                    | TGCTCTTCTGTATCGCCAGT      | GCCGTGTTAAGGAATCTGCTG     |
| <i>mDGAT2</i>                    | CCGCAAAGGCTTTGTGAAG       | GGAATAAGTGGGAACCAGATCA    |
| <i>mF4/80</i>                    | CTTTGGCTATGGGCTTCCAGTC    | GCAAGGAGGACAGAGTTTATCGTG  |
| <i>mFas</i>                      | GGAGGTGGTGATAGCCGGTAT     | TGGGTAATCCATAGAGCCAG      |
| <i>mHPRT</i>                     | TTGCTCGAGATGTCATGAAGGA    | AGCAGGTCAGCAAAGAACTTATAGC |
| <i>mIL-1<math>\beta</math></i>   | GCTCTCTATGGATCGCCTCAC     | GGCTTCAGACTGGTACACATT     |
| <i>mIL-6</i>                     | AGTCCACCGTGTATGCCTTCT     | GAGACGCGACATTCTCAATGA     |
| <i>mMCP1</i>                     | AGGTCCCTGTCATGCTTCTG      | GCTGCTGGTGATCCTCTTGT      |
| <i>mPGC1<math>\alpha</math></i>  | CCCTGCCATTGTAAAGACC       | TGCTGCTGTTCCCTGTTTTTC     |
| <i>mPPAR<math>\gamma</math></i>  | GGCGATCTTGACAGGAAAGAC     | CCCTTGAAAAATTCGGATGG      |
| <i>mSCD1</i>                     | GGGACAGATATGGTGTGAAACTATG | TTACAGACACTGCCCTCAAC      |
| <i>mTNF<math>\alpha</math></i>   | CCAGGCTACAGTGGGACATT      | AAGGAATGCAGGTCCACATC      |
| <i>mUCP1</i>                     | AGGCTTCCAGTACCATTAGGT     | CTGAGTGAGGCAAAGCTGATT     |

---
